# Supplementary material
Source: PubMed Central journal article supplement (PMC6439717)
Supplement: jamaophthalmol-137-272-s001.pdf [file jamaophthalmol-137-272-s001.pdf]

## Supplementary Online Content

Rizzo S, Cinelli L, Finocchio L, Tartaro R, Santoro F, Gregori NZ. Assessment of postoperative morphologic retinal changes by optical coherence tomography in recipients of an electronic retinal prosthesis implant. *JAMA Intern Med*. Published online January 3, 2019. doi:10.1001/jamaophthalmol.2018.6375

### **eMethods.** Inclusion and Exclusion Criteria

This supplementary material has been provided by the authors to give readers additional information about their work

**eMethods.** Inclusion and Exclusion Criteria

All patients were screened preoperatively and included or excluded following the Argus II CE approved indications. Inclusion criteria included age 25 years or older, diagnosis of severe to profound outer retinal degeneration, some residual light perception and if none, the retina had to be able to respond to electrical stimulation by visual evoked potential (VEP), a previous history of useful form vision, and an axial length between 20.5 and 26.0 mm. Exclusion criteria included ocular diseases that could interfere with adequate transmission of electric stimulation from the inner retina to the central nervous system (e.g. optic nerve disease, central retinal artery or vein occlusion, history of retinal detachment, trauma, severe strabismus, full-thickness macular hole, steep macular staphyloma), ocular conditions that could prevent successful implantation of the Argus II implant or adequate postoperative visualization (extremely thin conjunctiva, corneal opacities or advanced corneal dystrophies), the inability to tolerate general anesthesia, metallic or active implantable devices (cochlear implant) in the head, any condition that prevents understanding or communication of informed consent or fitting of the device (significant cognitive decline), the desire to become pregnant, poor motivation and/or excessive expectations, and a predisposition to eye rubbing.
